1 **A multivariate phylogenetic comparative method incorporating a**  
2 **flexible function between discrete and continuous traits**

3 Yuki Haba<sup>1</sup> & Nobuyuki Kutsukake<sup>2</sup>

- 4 1. Department of Ecology and Evolutionary Biology, Princeton University  
5 (corresponding author: [yhaba@princeton.edu](mailto:yhaba@princeton.edu))  
6 2. Department of Evolutionary Studies of Biosystems, Sokendai, The Graduate  
7 University for Advanced Studies, Hayama, Kanagawa 240-0193, Japan,  
8 ([kutsu@soken.ac.jp](mailto:kutsu@soken.ac.jp))

## 9 **Abstract**

10 One major challenge of using the phylogenetic comparative method (PCM) is the analysis of the  
11 evolution of interrelated continuous and discrete traits in a single multivariate statistical  
12 framework. In addition, more intricate parameters such as branch-specific directional selection  
13 have rarely been integrated into such multivariate PCM frameworks. Here, originally motivated  
14 to analyze the complex evolutionary trajectories of group size (continuous variable) and social  
15 systems (discrete variable) in African subterranean rodents, we develop a flexible approach using  
16 approximate Bayesian computation (ABC). Specifically, our multivariate ABC-PCM method  
17 allows the user to flexibly model an underlying latent evolutionary function between continuous  
18 and discrete traits. The ABC-PCM also simultaneously incorporates complex evolutionary  
19 parameters such as branch-specific selection. This study highlights the flexibility of ABC-PCMs  
20 in analyzing the evolution of phenotypic traits interrelated in a complex manner.

21

22 Key words: Phylogenetic comparative method (PCM), approximate Bayesian computation  
23 (ABC), multivariate analysis, social evolution, African mole rats

## 24 **Introduction**

25 Phylogenetic comparative methods (PCMs) provide a powerful statistical framework for  
26 investigating the patterns and processes of trait evolution (Felsenstein 1985; Harvey & Pagel  
27 1991; Nunn 2011; Garamszegi 2014a, 2014b). The recent development of PCMs permits  
28 analyses of biologically interrelated discrete and continuous variables in a single multivariate  
29 statistical framework (Table 1). The development of such multivariate PCMs is crucial for two  
30 reasons. First, conducting two separate univariate analyses for a continuous trait and a discrete  
31 trait is redundant when the two variables are interrelated. Second, and more importantly, separate  
32 univariate analyses will miss the opportunity to consider important biological links between  
33 these traits.

34 The threshold model (Felsenstein 2005, 2012) was among the first PCMs to fully  
35 combine both discrete and continuous traits. The idea of the threshold model was originally  
36 developed in quantitative genetics by Wright (1934) to understand how multiple underlying  
37 genetic loci contribute to categorical traits such as the number of digits in guinea pigs. The  
38 threshold model assumes an unobservable continuous trait called ‘liability’ that underlies a  
39 discrete trait of interest. Because the liability is a continuous trait, Brownian motion has been  
40 conventionally used to model its evolution. Then, the state of the discrete trait of interest is  
41 determined by whether the liability trait value is below or above a particular threshold. This  
42 model allows users to incorporate both continuous and discrete traits in a straightforward way, as  
43 well as to estimate the covariance between the liability trait and other continuous traits of  
44 interest. However, because liability is unobservable, it is impossible to directly infer a latent  
45 function between the discrete trait and other observable continuous traits of interest. Moreover,  
46 although it is convenient to assume that the discrete trait is determined by a simple threshold  
47 (which can be treated as a probit link function in a framework of a phylogenetic generalized  
48 linear mixed model, PGLMM; Hadfield 2015; also see Ives and Garland 2014), it is unclear if  
49 the assumption is always biologically valid. At the very least, it is desirable for researchers to be  
50 able to assume other forms of latent functions (Fig. 1).

51 In addition to Felsenstein’s threshold model, other methods that can link discrete traits and  
52 continuous traits have been proposed (Ives & Garland 2010, 2014; Hadfield and Nakagawa  
53 2009; Hadfield 2015; see Table 1). For example, Ives and Garland (2010) developed a  
54 phylogenetic logistic regression to test the effects of observable continuous independent traits on  
55 a discrete dependent trait (phylogenetic logistic regression, Ives & Garland 2010). Hadfield and  
56 Nakagawa proposed a phylogenetic generalized linear mixed model employing a Bayesian  
57 approach (MCMCglmm, Hadfield and Nakagawa 2009; Hadfield 2015; also see Ives and

58 Garland 2014 for other approaches and a comparison of their performance). These approaches  
59 successfully extended traditional linear models to enable nonlinear link functions (logit function  
60 in a phylogenetic logistic regression; logit or probit functions in MCMCglmm) between discrete  
61 and continuous traits. Notably, a probit-GLM can be mathematically equivalent to the threshold  
62 model (see Hadfield 2015). However, limitations to these models still exist. For example, the  
63 model by Ives and Garland (2010) assumes that the continuous traits are known values measured  
64 empirically and does not allow the continuous traits to evolve along the tree (see Felsenstein  
65 2012 and Hadfield 2015 for models that do not have such assumption; but also see Ives and  
66 Garland 2014 for analyses of the relatively small effects of phylogenetic signal on continuous  
67 traits). Moreover, the link function in the models is predetermined. In most cases, equipped  
68 functions (e.g., logit or probit functions) are those that have useful mathematical properties for  
69 analyzing a relationship between discrete and continuous traits. Still, cases may exist in which it  
70 is biologically valid to establish a more complicated function between discrete and continuous  
71 traits. Therefore, it is ideal to prepare a framework that enables researchers to examine a flexible  
72 function to test specific hypotheses of interest.

73 Furthermore, analyses will be even more complex if additional variables of interest are  
74 included, such as the presence of branch-specific directional selection (Kutsukake and Innan  
75 2013, 2014). This complication often prevents the description of a likelihood function of the  
76 model, which most conventional PCMs require (e.g., the maximum likelihood, Bayesian  
77 approach). The aforementioned PCMs (Felsenstein 2005, 2012; Ives and Garland 2010, 2014;  
78 Hadfield and Nakagawa 2009; Hadfield 2015) cannot incorporate branch-specific directional  
79 selection into their models.

80 Here, we propose a PCM using approximate Bayesian computation (ABC) to overcome the  
81 difficulties discussed above (Fig. 2). ABCs have been shown to facilitate flexible analyses in a  
82 comparative framework and therefore have increasingly been applied to PCMs with intricate  
83 evolutionary scenarios (Bokma 2010; Slater *et al.*, 2012; Kutsukake and Innan 2013, 2014; Janzen  
84 *et al.* 2015; Harano & Kutsukake 2018). Briefly, an ABC-PCM estimates parameters of interest by  
85 simulating phenotypic evolution without a likelihood function (Beaumont 2010; Bertorelle *et al.*  
86 2010; Csillery *et al.* 2010). The proposed parameters are accepted only when the simulated data  
87 and real data are similar, and the accepted data comprise posterior distributions of parameters.  
88 Thanks to this flexibility, ABC-PCMs enable researchers to test evolutionary models whose  
89 likelihood function is mathematically intractable.

90 Our initial motivation for extending ABC-PCMs was to analyze a heterogeneous evolutionary  
91 pattern between group size and social system in African subterranean mole rats (family

92 Bathyergidae; Table 2). In this clade, species have varied social structures that span solitary,  
93 social, and eusocial states. Eusociality has independently evolved twice: in naked mole rats  
94 (*Heterocephalus glaber*) and in Damaraland mole rats (*Fukomys damarensis*) (Jarvis 1981;  
95 Sherman *et al.* 1991; Bennett & Faulkes 2000; Faulkes & Bennett 2013). We hypothesized that  
96 the probabilities of evolutionary transitions among eu/social and solitary states (discrete trait)  
97 change depending on group size (continuous trait). To capture all of these complex evolutionary  
98 features, we are required to incorporate (1) the evolutionary trajectory of sociality and group  
99 size, (2) the parameters for the trait-dependent latent functions, and (3) the presence of branch-  
100 specific directional selection on group size in the two eusocial species. Certain aspects of these  
101 features can be analyzed using previous methods; however, it is not possible to incorporate all  
102 factors in a single model with those methods. Then, based on the example data, we discuss how  
103 this ABC-PCM can be used for inferring other similar complex evolutionary processes.

104

## 105 **Methods**

### 106 *ABC-PCM*

107 Our ABC-PCM extends a previously developed framework (Fig. 2; Kutsukake & Innan 2013,  
108 2014) designed to analyze heterogeneous evolutionary modes whose likelihood is not  
109 straightforward to describe. We assume knowledge of the species tree  $\Psi$ , which consists of  
110 information on tree shape and the lengths of all branches in the topology. We also assume that  
111 trait data at the tips of the tree  $\mathbf{D}$  have been observed.

112 In bivariate analyses of continuous and discrete traits, several causal patterns are  
113 possible. For example, a discrete trait can be determined by a continuous trait that evolves on its  
114 own, or vice versa. Alternatively, it is also possible to assume no *a priori* causality between the  
115 continuous or discrete traits (Hadfield and Nakagawa 2009; Ives and Garland 2010). Any of  
116 these cases can be modeled by the ABC-PCM framework proposed in this paper. Moreover, this  
117 framework can be used regardless of whether a given value is latent (e.g., liability in the  
118 threshold model) or measurable.

119 We hereafter consider a simple case of interrelated evolution in which a continuous trait  
120 determines a discrete trait. In our example study of African subterranean mole rats, both traits  
121 were measurable.

122 Briefly, our ABC-PCM process is implemented as follows (see Fig. 2 for a visual  
123 schematic).

124

125 Let  $\mathcal{A}$  be the parameter set to be estimated based on a hypothesis.

126 (Step 1) Determine prior distributions for all parameters in  $\mathcal{A}$ . If prior biological  
127 knowledge is available, it can be used to set informative (i.e., strong) prior distributions.  
128 (Step 2) Parameters used in the simulation ( $\mathcal{A}'$ ) are randomly generated from the prior  
129 distributions.  
130 (Step 3) Using  $\mathcal{A}'$ , the trait evolution is simulated on the phylogeny  $\mathcal{Y}$ . In the current  
131 model, the trait simulation has two parts corresponding to continuous and discrete trait  
132 evolution (Fig. 1).

133 (Step 3a) The continuous trait evolves via Brownian motion (Felsenstein 1985; note  
134 that other evolutionary models can be used; see Kutsukake and Innan 2013).

135 (Step 3b) Then the discrete trait is determined according to the probability of  
136 transition between two states ( $A$  and  $B$ ) as a function of the continuous trait. Note  
137 again that this setting can be relaxed such that causation between continuous and  
138 discrete traits can be flexibly changed according to a hypothesis of interest. Here,  
139  $p(x)$  is the probability function that state  $A$  changes to  $B$  given the continuous trait  $x$ .  
140 Similarly,  $q(x)$  is the probability that state  $B$  changes to  $A$  given the continuous trait  
141  $x$  (Fig. 1).

142 (Step 4) Calculate the likelihood by comparing simulated data  $\Theta$  with the real data  $D$  and  
143 determine whether the parameter set is accepted or rejected. A joint probability (full  
144 likelihood) for the comparison of  $n$  species can be calculated. In most cases, this  
145 probability is difficult to obtain. In such cases, a composite likelihood that is proportional  
146 to the full likelihood can be used as an approximate proxy. Intraspecific variation in the  
147 trait data can be considered by assuming a certain distribution for the trait when  
148 calculating the likelihood.

149 Then the acceptance or rejection of the parameters can be determined based on the  
150 likelihood. Several methods of judgment exist (Marjoram *et al.* 2003; Marjoram and  
151 Tavaré 2006).

152 (Step 5) Repeat Steps 2–4 until a sufficient number of parameters  $\mathcal{A}'$  is accepted. Then,  
153 posterior distributions and credible intervals can be estimated.

154  
155 Although the fundamental structure of ABC is straightforward, the number/choice of summary  
156 statistics and the width of tolerance for judging the acceptance or rejection of simulated data at  
157 Step 4 are controversial, and there is no general consensus on the choice of summary statistics  
158 and tolerance (Beaumont *et al.* 2002; Csillery *et al.* 2010; Leuenberger & Wegmann 2010). In

159 this study, we use a combination of perfect match and joint probability as summary statistics (see  
160 *Acceptance and summary statistics* below for details).

161

### 162 *Application—social evolution in African mole rats*

163 One example of complex evolution where continuous and discrete traits are interrelated is  
164 social evolution. Sociality in animals can be characterized using a discrete classification based on  
165 mating and/or social systems (e.g., Shultz *et al.* 2011). Average group size of a species, a  
166 continuous trait, is also an important variable in characterizing sociality in animals (e.g.,  
167 comparative analyses: Faulkes *et al.* 1997; Sheehan *et al.* 2015). Loss of sociality is correlated  
168 with a decrease in group size (secondary loss of sociality; Wcislo & Danforth 1997; Beauchamp  
169 1999; Sheehan *et al.* 2015). Likewise, cooperative social systems are likely to appear as the  
170 group size increases (e.g., limited dispersal by ecological constraints: Emlen 1982; Duffy &  
171 Macdonald 2010). Thus, the complex social evolution across African mole rats is an ideal system  
172 to test our framework. Here, species-specific sociality and the mean group size for each species  
173 ( $x$ ) are the target traits.

174

### 175 *Dataset*

176 We surveyed the literature for field data on the sociality (solitary, social, or eusocial), mean  
177 group size, and/or distribution of group sizes in each species (Table 2). When the distribution of  
178 group size was available, we calculated its mean and standard deviation for each species. For  
179 solitary species, we regarded the mean group size as one. In reality, however, their group sizes  
180 can deviate from this value, because females may have dependent, pre-dispersal offspring; thus,  
181 the group size of solitary species can also have a distribution. Therefore, we incorporated a  
182 realistic value for the variance of solitary species (Table 2). We used the phylogeny presented in  
183 Faulkes *et al.* (2004), who used mitochondrial genes 12s rRNA and *cyt b*. The mean value of the  
184 estimated divergent interval in millions of years was used as the length of each branch.

185

### 186 *Parameter set and trait simulation*

187 The trait simulation included six parameters to be estimated: the group size of the most  
188 recent common ancestor (MRCA) ( $\theta$ ), the rate of evolution ( $\mu$ ), the parameters of directional  
189 selection ( $k_n$  and  $k_d$ ), and the parameters for latent functions ( $a$  and  $b$ , or  $c$  and  $d$ , depending on  
190 the model used; see next section). Table 3 shows the notation and settings of the prior  
191 distributions.

192 The evolutionary process of the continuous trait was as follows. First, we generated the

193 values of six parameters from the prior distributions. Then, based on the proposed value of  $x$  at  
194 the root (i.e., the group size of the MRCA,  $\theta$ ), we randomly determined the state (i.e., sociality)  
195 of the MRCA by either  $p(x)$  or  $q(x)$ . The number of evolutionary events that change traits (i.e.,  
196 either an increase or decrease in group size) on each branch was respectively modeled as a  
197 random number from a Poisson distribution with a mean equaling the product of the evolutionary  
198 rate,  $\mu$  (trait change per million years), and branch length  $\tau$  (millions of years). The degree of  
199 trait change by one evolutionary event is a random value from an exponential distribution, with  
200 its mean being an arbitrary value  $\varphi$  (set to 0.01).  $\varphi$  corresponds to the average effect of one  
201 change on the trait value. We used an exponential distribution because a change in trait due to  
202 one evolutionary event would have small effects on traits in most cases, and large effects less  
203 frequently. Thus,

204  $\Delta^+ = \text{Pois}(\mu \times \tau_i) \times \exp(\varphi) \dots$  trait increase in a branch

205  $\Delta^- = \text{Pois}(\mu \times \tau_i) \times \exp(\varphi) \dots$  trait decrease in a branch

206 where  $\tau_i$  is the length of the  $i$ th branch. The total trait change on the branch is calculated as  $\Delta^+ -$   
207  $\Delta^-$ .

208 Changes in group size caused by one evolutionary event would depend on the initial group  
209 size. For example, an increase in the group size by one individual will have different biological  
210 meanings in solitary and eusocial species. Therefore, we transformed the value of group size to a  
211 natural logarithmic scale during trait simulation. Because the mean group size  $x$  cannot be less  
212 than one, we enforced a lower bound of one. That is, when a trait change resulted in a value less  
213 than one on a branch, the change was not implemented.

214 We also tested whether there were selective pressures for increasing group size in the two  
215 branches leading to eusocial species. In our ABC-PCM model, the parameter  $k$  represents  
216 directional selection (Kutsukake & Innan 2013, 2014). The selection parameter  $k$  biases the  
217 number of positive or negative trait changes such that the number of trait changes  $\text{Pois}(\mu \times \tau_i) \times$   
218  $\exp(\varphi)$  is multiplied or divided by  $k$ , respectively (see Kutsukake & Innan 2013 for more details).  
219 Thus,

220  $\Delta^+ = \text{Pois}(\mu \times \tau_i \times k) \times \exp(\varphi) \dots$  trait increase in a branch

221  $\Delta^- = \text{Pois}(\mu \times \tau_i / k) \times \exp(\varphi) \dots$  trait decrease in a branch

222 and again, the total trait change on the branch is calculated as  $\Delta^+ - \Delta^-$ .

223 When  $k = 1$ , the evolutionary mode of trait evolution is asymptotically identical to the  
224 Brownian motion. On the other hand, a significant departure of  $k$  from 1 is used as a signature of  
225 directional selection.



226 In this analysis, we set selection parameters for the branches for both naked mole rats and  
227 Damaraland mole rats as  $k_n$  and  $k_d$ , respectively (Table 3), to test our hypothesis that branch-  
228 specific selective pressure has increased group size in eusocial species (Jarvis & Bennett 1993;  
229 Young *et al.* 2015). When the 95% CI of the posterior distribution of  $k$  was larger than 1, it was  
230 considered a signature of directional selection for larger group size.

### 231 232 *Models of latent evolutionary functions*

233 At each evolutionary step, the discrete trait value was determined by the continuous trait value  
234 according to the latent functions (see Step 3b of *ABC-PCM*). Because the shape of this function  
235 between sociality and group size was unknown, we took advantage of the flexibility of our ABC-  
236 PCM framework and tested two examples of evolutionary models with different transition  
237 functions,  $p(x)$  and  $q(x)$ . We note that this framework is not limited to these two models but can  
238 use any function, depending on the focal biological traits and hypotheses of interest. For  
239 simplicity, we set the latent evolutionary functions such that  $p(x) + q(x) = 1$ , but this is not  
240 required if one desires otherwise.

### 241 242 *Model 1: Logistic function*

243 In this model, we used a logistic function as the latent evolutionary function, which was similar  
244 to a previous model using a generalized linear model for a binary dependent term (Ives and  
245 Garland 2010). The transition functions  $p(x)$  and  $q(x)$  were defined as follows:

$$246 \quad p(x) = 1 - 1 / (1 + \exp(-a \times (x - b)))$$
$$247 \quad q(x) = 1 / (1 + \exp(-a \times (x - b)))$$

248 The parameter  $a$  determined the curvature of  $p(x)$  and  $q(x)$ , i.e., the effects of the group size on  
249 sociality (Fig. 1). When  $a$  is equal to 0,  $p(x)$  and  $q(x)$  are flat and the transition between social and  
250 solitary is independent of group size (Fig. 1, right). When  $a$  is positive, a species with large group  
251 size is likely to be social; when  $a$  is negative, a species with large group size is likely to be solitary.  
252 Importantly, when  $|a|$  is large enough, the transition between social and solitary is determined by  
253 a certain group size, which virtually behaves like a step function (Fig. 1, left). The parameter  $b$  is  
254 the  $x$  value at which  $p(x)$  and  $q(x)$  equal 0.5, and determines the group size at which the probability  
255 of transitioning from solitary to social becomes larger than the probability of the reverse. Because  
256 the curvature and midpoint of  $p(x)$  and  $q(x)$  (i.e.,  $a$  and  $b$ ) were unknown *a priori*, we set broad  
257 prior distributions of  $a$  and  $b$  (Table 3).

### 258 259 *Model 2: Exponential function*

260 In the second model, we used an exponential function as the latent evolutionary function. We set  
261 the transition functions  $p(x)$  and  $q(x)$  as follows:

$$262 \text{ When } d > 0 \begin{cases} p(x) = \begin{cases} 1 - \exp(-c \times (x - d)), & x > d \\ 0, & x \leq d \end{cases} \\ q(x) = \begin{cases} \exp(-c \times (x - b)), & x > d \\ 1, & x \leq d \end{cases} \end{cases}$$

265

$$266 \text{ When } d \leq 0 \begin{cases} p(x) = \begin{cases} 1 - \exp(c \times (x - d)), & x > d \\ 0, & x \leq d \end{cases} \\ q(x) = \begin{cases} \exp(c \times (x - d)), & x > d \\ 1, & x \leq d \end{cases} \end{cases}$$

267

268 These functions describe an exponential decrease or diminishing increase in the transition  
269 probability, and a given species with a mean group size of one is always a solitary species. Similar  
270 to  $a$  and  $b$  in model 1,  $c$  and  $d$  determine the curvature of the exponential function and the point at  
271 which the exponential decrease/increase begins, respectively. Note that one side of the exponential  
272 function used here is asymptotically equal to either 0 or 1 when  $x$  is sufficiently large, but that of  
273 the other side is not; therefore, we set the probability of state change as 0 or 1 when  $x$  is smaller  
274 than  $d$ , at which the functions reach 0 or 1, respectively.

275

### 276 *Acceptance and summary statistics*

277 Among ABC-PCMs, no clear consensus has been reached concerning the number/choice of  
278 summary statistics or the width of tolerance for judging the acceptance or rejection of simulated  
279 data. In the present analyses, we used two summary statistics to assess the fit of the simulated  
280 data to actual data. First, for the discrete variable (i.e., sociality), we only accepted simulations in  
281 which the simulated data were a perfect match to the real data. For the continuous variable, we  
282 used a conventional method that uses a joint probability (Kutsukake & Innan 2013, 2014); we  
283 first calculated the probability that the real trait value is gained under a simulated trait value for  
284 all 10 species. When calculating the probability, group size (back-transformed to an arithmetic  
285 scale from a log-transformed value) was assumed to be normally distributed with a mean and  
286 standard deviation equal to those of the real data. Then we calculated the product of those 10  
287 probabilities and used the joint probability as a summary statistic. Simulated parameter sets were  
288 accepted in proportion to the joint probability. For example, if the joint probability was 0.8 for a  
289 simulation, the parameter set of the simulation has an 80% chance of being accepted. Because  
290 the joint probability can be considered a direct likelihood, this method is superior to the standard

291 ABCs, which depend on the choice of summary statistics and arbitrary tolerance (discussed in  
292 Kutsukake & Innan 2013, 2014).

293 In total, 500 parameter sets were collected for estimating posterior distributions. All  
294 results were visualised using R version 3.5.3 (R Core Team 2017). The simulation code was  
295 written in C and is available in a public repository (<https://github.com/YukiHaba/ABC-PCM>).

296

## 297 **Results**

### 298 *Model 1: Logistic functions*

299 When the latent evolutionary function was logistic, the social system of the MRCA was  
300 estimated to be solitary in 61.4% of the cases (Fig. 2a, node A). The accepted functions of the  
301 transition probabilities varied widely (Fig. 3a), but showed several consistent patterns. First, the  
302 curvature parameter of functions,  $a$ , was positive in all cases (Table 3, Fig. 3b; see  
303 Supplementary material for a low risk of type I error), indicating that the probability of transition  
304 from a solitary to social species increased as group size increased. In addition,  $p(x)$  typically  
305 increased rapidly around  $x = 2$  to 4, which corresponded to the peak of the posterior distribution  
306 of  $b$  (Table 3, Fig. 3c).

307 At each internal node before reaching the common ancestor of social species, the inferred  
308 social system was predominantly solitary (Fig. 2a). The common ancestor of solitary species was  
309 likely to be solitary (Fig. 2a, node C), and a similar pattern was evident at the node of the  
310 common ancestor of *B. janetta* and *B. suillus*. By contrast, at the nodes leading to the clade of  
311 *Fukomis*, predominantly social states were inferred (Fig. 2a, node B). The estimated group sizes  
312 were consistent with the inferred social systems at internal nodes (Fig. 2b–d); the more social the  
313 system was likely to be, the larger the group size.

314 We detected marginal directional selection for increasing group size in the branch that led  
315 to naked mole rats (the proportion of  $k_n < 1$  was 6.4%, Fig. 2f). By contrast, we did not detect  
316 significant directional selection in the branch leading to another eusocial species, Damaraland  
317 mole rats (the proportion of  $k_d < 1$  was 15.8%, Fig. 2g). Based upon this non-significant result  
318 for  $k_d$ , we repeated the estimation after excluding  $k_d$  (i.e., directional selection was assumed only  
319 for the branch leading to naked mole rats), but the results did not change qualitatively (data not  
320 shown).

321

### 322 *Model 2: Exponential functions*

323 With the exponential latent evolutionary functions, the MRCA was inferred to be solitary in  
324 60.4% of the cases (Fig. 4a, node A), similar to model 1. Again, although the accepted functions

325 of the transition probabilities between social and solitary varied (Fig. 5a), the curvature of  $p(x)$ ,  
326  $c$ , was always positive (Table 3, Fig. 5b; see Supplementary material for a low risk of type I  
327 error).

328 Group size and sociality at each internal node were almost identical to those in model 1.  
329 Within the clade of *Fukomis*, we inferred predominantly social states (Fig. 4a, node B) and  
330 relatively large group sizes (Fig. 4c). Within the clade of *Bathyergus* and *Georychus*, in contrast,  
331 the social system at each node was consistently solitary (Fig. 4a, node C) and the group size was  
332 around 2 to 4 (Fig. 4d).

333 We detected significant directional selection for increasing group size in the branch  
334 leading to naked mole rats (the proportion of  $k_n < 1$  was 3.4%; Fig. 4f). However, we did not  
335 detect significant directional selection in the branch to eusocial Damaraland mole rats (the  
336 proportion of  $k_d < 1$  was 16.2%; Fig. 4g). Again, based on this non-significant result for  $k_d$ , we  
337 repeated the estimation after excluding  $k_d$  (i.e., directional selection was assumed only for the  
338 branch leading to naked mole rats); however, the result did not change qualitatively (data not  
339 shown).

340

## 341 Discussion

342 This study proposes an extension of a previously described ABC-PCM (Kutsukake & Innan  
343 2013, 2014) to analyze complex evolutionary scenarios in which discrete and continuous traits  
344 are biologically interwoven. This is the first ABC-PCM framework that allows simultaneous  
345 analyses of the interdependent evolution of discrete and continuous traits. In addition, our model  
346 offers at least two advantages over other existing methods.

347 First, this study incorporated a feature that has rarely been included in a PCM framework:  
348 branch-specific directional selection (Kutsukake & Innan 2013, 2014; Harano & Kutsukake  
349 2018). This inclusion was possible thanks to the flexibility of the ABC-PCM, which does not  
350 require the mathematical expression or analytic solution of a likelihood function. Second, our  
351 multivariate model can incorporate flexible user-defined functions that describe the evolutionary  
352 relationship between continuous and categorical traits. Previous methods can incorporate  
353 nonlinear functions such as logit and probit functions (Ives and Garland 2010; Hadfield &  
354 Nakagawa 2009; Hadfield 2015), but the choice of a latent function is less flexible than in our  
355 present method. Another well-established method for simultaneously analyzing both continuous  
356 and categorical traits is the threshold model (Felsenstein 2005, 2012). The threshold model is  
357 equivalent to a phylogenetically controlled linear model with a probit latent function (see  
358 Supplementary Material in Hadfield 2015 for a useful graphical representation). Although the

359 assumption is mathematically convenient for analyses, it may be an oversimplification of the  
360 evolutionary relationship between the continuous and categorical traits of interest.

361 Applying this new approach to data on African subterranean rodents, we estimated the  
362 intricate evolutionary trajectory of sociality and group size. Two models with different latent  
363 evolutionary functions were tested: logistic and exponential. Although the exponential function  
364 has not been used in previous PCMs, we believe that this function is suitable for our study  
365 species for two reasons. First, group size should have a minimum value of one, and second, a  
366 species whose group size is one must be a solitary species. Although these functions have  
367 different mathematical characteristics and are not nested, they have common features such as a  
368 monotonic increase and an asymptotical approach from one to zero. Potentially due to these  
369 common features, the estimated parameters showed similar posterior distributions. In both  
370 models the social state of the MRCA was not decisively solitary or social, and its estimated  
371 group size varied (node A in Figs. 2a and 4a).

372 The latent evolutionary functions  $p(x)$  and  $q(x)$  had a consistent pattern in both models  
373 (Figs. 3 and 5). Namely, most of the accepted functions had a steep transition around a group  
374 size of 2 to 4. This indicates that this particular window of group size was an evolutionary  
375 tipping point of the transition between solitary and social states. This study is the first to  
376 quantitatively infer the range of group size that is crucial to the evolution of sociality in this  
377 clade.

378 We tested differential selective pressure on group size in the branches leading to the two  
379 eusocial species in this clade ( $k_n$  and  $k_d$ ); we detected directional selection ( $k_n$ ) for larger group  
380 size in the branch leading to naked mole rats in model 2 (Fig. 4f) but not in model 1 (Fig. 2f). In  
381 both models, a selective pressure was not detected in the branch leading to Damaraland mole rats  
382 ( $k_d$ , Figs. 2g and 4g). Thus, although both species are deemed eusocial, the two species may have  
383 undergone qualitatively different evolutionary paths (Burda *et al.* 2000). Future studies should  
384 explore the differences in the ecological and evolutionary causes of the evolution of these two  
385 eusocial species.

386 One critical limitation of this case study was the relatively low sample size (10 species;  
387 see Supplementary material). This sample size is caused by three inevitable limitations. First, the  
388 family Bathyergidae is a monotypic group composed of less than 20 OTUs, which is an  
389 inevitable constraint on sample size. Second, detailed data for group size are not available for all  
390 species of this family, which further limits the available data. Finally, and most importantly,  
391 expanding the number of study species to include closely related non-subterranean species is  
392 questionable, as it is highly likely that the underground ecological niche has affected predation

393 pressure and consequently sociality. More broadly, it remains unclear whether heterogeneity of  
394 traits other than the traits of interest would affect biological interpretation in PCM studies based  
395 on a large sample size. It is generally believed that larger sample sizes (a larger number of  
396 species, or more precisely, a larger number of evolutionary transitions) would produce a more  
397 powerful test in PCMs. While this is true, it remains largely undiscussed how the inclusion of  
398 species that have fundamentally different ecological or behavioral traits would affect the results.  
399 In this sense, in addition to a large-scale comparison, it is important to conduct PCMs that focus  
400 on a taxon that shares fundamental traits, even if the sample size is not very large.

401 One major challenge in ABC-PCMs is that they are computationally intensive. In our  
402 study, for example, it took several days to accept one parameter set (MacPro, OS 10.6.7, 2 x 2.93  
403 GHz Quad-Core Intel Xeon; also see Kutsukake & Innan 2013). To compare the performance of  
404 our model to an available method, we ran a bivariate model on our dataset and phylogeny using  
405 MCMCglmm (Hadfield & Nakagawa 2009; Hadfield 2015) assuming that group size and  
406 sociality follow Gaussian and probit (“threshold”) families, respectively. For simplicity, we ran  
407 the program without incorporating intraspecific variation, branch-specific selection, or the  
408 bounding of group size. The MCMCglmm results qualitatively agreed with our results (e.g., 95%  
409 CI of the covariance between group size and sociality  $> 0$ ), yet the process took only a few  
410 minutes to an hour on a standard laptop, depending on the parameters (results not shown). Thus,  
411 the scope of the present ABC-PCM algorithm is currently limited to analyses of relatively small  
412 to moderate numbers of species (29 species in Harano & Kutsukake 2018), but it is not suitable  
413 for a large number of species. Improvements in both efficient simulation algorithms and  
414 computational power will enable analyses based on a larger number of species.

415 In summary, we have developed a flexible multivariate ABC-PCM that has great potential  
416 for testing biologically intricate scenarios of trait evolution. Although our analyses considered the  
417 evolutionary transition of sociality in a relatively small number of species, our method can be  
418 applied to other topics and to larger datasets. Despite the fact that our analyses focused on a simple  
419 case in which a continuous trait affects the state of a discrete trait, other causal patterns can  
420 be dealt with by a flexible setting of an evolutionary simulation. Furthermore, our ABC-PCM  
421 framework can also be extended to model more complex evolutionary trajectories, such as  
422 asymmetric transitions between states and/or more than two states of discrete traits with different  
423 transition functions. Thus, our method allows evolutionary biologists to explore various  
424 hypotheses of interest concerning the evolution of interrelated traits.

425

426 **Acknowledgements**

427 We would like to thank Dustin R. Rubenstein, Rafael Maia, and Margaret E. O'Brien at Columbia  
428 University and Jessica Zung at Princeton University for useful comments and advice. Masahito  
429 Tsuboi at University of Oslo also provided useful insights on the earlier version of manuscript.  
430 Two reviewers gave detailed and helpful comments on the manuscript. This study was financially  
431 supported by MEXT (No. 25711025) to K. N.

432

433 **Author contributions**

434 Y. H. and K. N. conceived, designed, and performed the analysis. Both discussed the result and  
435 wrote the final manuscript.

436

437 **Conflict of interest**

438 None declared.

439 **Literature cited**

- 440 Bennett, N.C., Jarvis, J.U.M. & Cotterill, F. P. D. 1994. The colony structure and reproductive  
441 biology of the afrotropical Mashona mole-rat, *Cryptomys darlingi*. *J. Zool.* **234**: 477-487.
- 442 Beaumont, M.A. 2010. Approximate Bayesian computation in evolution and ecology. *Ann. Rev.*  
443 *Ecol. Evol. Syst.* **41**:379–406.
- 444 Beaumont, M. A., Zhang, W. & Balding, D. J. 2002. Approximate Bayesian computation in  
445 population genetics. *Genetics* **162**:2025–2035.
- 446 Beauchamp, G. 1999. The evolution of communal roosting in birds: origin and secondary losses.  
447 *Behav. Ecol.* **10**: 675-687.
- 448 Bennett, N.C. & Faulkes, C.G. 2000. African mole-rats: ecology and eusociality. Cambridge, UK:  
449 Cambridge University Press.
- 450 Bokma, F., 2010. Time, species, and separating their effects on trait variance in clades. *Syst. Biol.*  
451 **59**:602–607.
- 452 Burda, H., Honeycutt, R.L., Begall, S., Locker-Grütjen, O. & Scharff, A. 2000. Are naked and  
453 common mole-rats eusocial and if so, why? *Behav. Ecol. Sociobiol.* **47**: 293-303.
- 454 Burda, H. & Kawalika M. 1993. Evolution of eusociality in the Bathyergidae: the case of the giant  
455 mole-rat (*Cryptomys mechowi*). *Naturwissenschaften* **80**:235-237.
- 456 Csillery, K., Blum, M.G., Gaggiotti, O.E. & François, O. 2010. Approximate Bayesian  
457 computation (ABC) in practice. *Trends. Ecol. Evol.* **25**:410–418.
- 458 Duffy, J.M. & Macdonald, K.S. 2010. Kin structure, ecology and the evolution of social  
459 organization in shrimp: a comparative analysis. *P. R. Soc. B.* **277**: 575-584.
- 460 Emlen, S.T. 1982. The evolution of helping. I. An ecological constraints model. *Am. Nat.* **119**:  
461 29–39.
- 462 Faulkes, C.G., Bennett, N.C., Bruford, M.W., O'brien, H.P., Aguilar, G.H. & Jarvis, J.U.M.  
463 1997. Ecological constraints drive social evolution in the African mole-rats. *P. R. Soc. B.*  
464 **264**: 1619-1627.



- 465 Faulkes, C.G., Verheyen, E., Verheyen, W., Jarvis, J.U.M. & Bennett, N.C. 2004.  
466 Phylogeographical patterns of genetic divergence and speciation in African mole-rats  
467 (Family: Bathyergidae). *Mol. Ecol.* **13**: 613-629.
- 468 Faulkes, C.G. & Bennett, N.C. 2013. Plasticity and constraints on social evolution in African  
469 mole-rats : ultimate and proximate factors. *Philos. T. R. Soc. B.* **368**:20120347.
- 470 Felsenstein, J. 1985. Phylogenies and the comparative method. *Am. Nat.* **125**: 1–15.
- 471 Felsenstein, J. 2005. Using the quantitative genetic threshold model for inferences between and  
472 within species. *Philos. T. R. Soc. B.* **360**: 1427-1434.
- 473 Felsenstein, J. 2012. A comparative method for both discrete and continuous characters using the  
474 threshold model. *Am. Nat.* **179**: 145-156.
- 475 Garamszegi, L.Z. 2014a. *Modern Phylogenetic Comparative Methods and their Application in*  
476 *Evolutionary Biology - Concepts and Practice*, (L.Z. Garamszegi, ed.). Springer,  
477 Heidelberg.
- 478 Garamszegi, L.Z. 2014b. Uncertainties due to within-species variation in comparative studies:  
479 measurement errors and statistical weights. In: *Modern Phylogenetic Comparative*  
480 *Methods and their Application in Evolutionary Biology - Concepts and Practice*, (L.Z.  
481 Garamszegi, ed.) pp. 157-199. Springer, Heidelberg.
- 482 Hadfield, J.D. & Nakagawa, S. 2009. General quantitative methods for comparative biology:  
483 phylogenies, taxonomies and multi-trait models for continuous and categorical characters.  
484 *J. Evol. Biol.* **23**: 494-508.
- 485 Hadfield, J. D. 2015. Increasing the efficiency of MCMC for hierarchical phylogenetic models of  
486 categorical traits using reduced mixed models. *Methods in Ecology and Evolution*  
487 **6.6**:706-714.
- 488 Harano, T. & Kutsukake, N. 2018. Directional selection in the evolution of elongated upper  
489 canines in clouded leopards and sabre-toothed cats. *J. Evol. Biol.*, **31**: 1268-1283.

- 490 Harvey P.H. & Pagel, M.D. 1991. The comparative method in evolutionary biology. Oxford  
491 University Press, Oxford
- 492 Ives, A. R. & Garland, T. 2010. Phylogenetic logistic regression for binary dependent variables.  
493 *Syst. Biol.* **59**: 9-26.
- 494 Ives, A. R. & Garland, T. 2014. Phylogenetic Regression for Binary Dependent Variables.  
495 In: *Modern Phylogenetic Comparative Methods and their Application in Evolutionary*  
496 *Biology - Concepts and Practice* (L.Z. Garamszegi, ed.), pp. 231-261. Springer,  
497 Heidelberg.
- 498 Janzen, T., Hoehna, S. & Etienne, R. S. 2015. Approximate Bayesian Computation of  
499 diversification rates from molecular phylogenies: introducing a new efficient summary  
500 statistic, the nLTT. *Methods Ecol. Evol.* **6**: 566-575.
- 501 Jarvis, J.U.M. & Bennett, N.C. 1993. Eusociality has evolved independently in two genera of  
502 bathyergid mole-rats—but occurs in no other subterranean mammal. *Behav. Ecol.*  
503 *Sociobiol.* **33**: 253-260.
- 504 Jarvis, J.U.M. 1981. Eusociality in a mammal: cooperative breeding in naked mole-rat colonies.  
505 *Science* **212**: 571–573.
- 506 Jones, K., Bielby, J., Cardillo, M. & Fritz, S. 2009. PanTHERIA: a species-level database of life  
507 history, ecology, and geography of extant and recently extinct mammals. *Ecology* **90**:  
508 2648.
- 509 Kutsukake, N. & Innan, H. 2013. Simulation-based likelihood approach for evolutionary models  
510 of phenotypic traits on phylogeny. *Evolution* **67**: 355-367.
- 511 Kutsukake, N. & Innan, H. 2014. Detecting phenotypic selection by approximate Bayesian  
512 computation (ABC) in phylogenetic comparative methods. In: *Modern Phylogenetic*  
513 *Comparative Methods and their Application in Evolutionary Biology - Concepts and*  
514 *Practice* (L.Z. Garamszegi, ed.), pp. 409-424. Springer, Heidelberg

- 515 Leuenberger, C. & Wegmann, D. 2010. Bayesian computation and model selection without  
516 likelihoods. *Genetics* **184**: 243-252.
- 517 Lewis, P. O. 2001. A likelihood approach to estimating phylogeny from discrete morphological  
518 character data. *Syst. Biol.* **50**: 913–925.
- 519 Marjoram P, Tavaré S. 2006. Modern computational approaches for analysing molecular genetic  
520 variation data. *Nat. Genet. Rev.* **7**:759–770
- 521 Marjoram P, Molitor J, Plagnol V, Tavaré S. 2003. Markov chain Monte Carlo without  
522 likelihoods. *Proc. Natl. Acad. Sci. USA* **100**:15324–15328
- 523 Nunn, C.L. 2011. The comparative approach in evolutionary anthropology and biology.  
524 University of Chicago Press, Chicago
- 525 Pagel, M. 1994. Detecting correlated evolution on phylogenies: a general method for the  
526 comparative analysis of discrete characters. *P. R. Soc. B.* **255**: 37-45.
- 527 R core team. 2017. R: A language and environment for statistical computing. *R Found. Stat.*  
528 *Comput. Vienna, Austria.*
- 529 Sheehan, M.J., Botero, C.A., Hendry, T.A., Sedio, B.E., Jandt, J.M., Weiner, S., Toth, A.L. &  
530 Tibbetts, E.A. 2015. Different axes of environmental variation explain the presence vs.  
531 extent of cooperative nest founding associations in *Polistes* paper wasps. *Ecol. Lett.* **18**:  
532 1057-67.
- 533 Sherman, P.W., Jarvis, J.U.M. & Alexander, R.D. 1991. The biology of the naked mole-rat.  
534 Princeton, NJ: Princeton University Press.
- 535 Shultz, S., Opie, C. & Atkinson, Q.D. 2011. Stepwise evolution of stable sociality in primates.  
536 *Nature* **479**: 219-222.
- 537 Sichilima, A.M., Faulkes, C.G. & Bennett, N.C. 2008. Field evidence for aseasonality of  
538 reproduction and colony size in the Afrotropical giant mole-rat *Fukomys mechowii*  
539 (Rodentia: Bathyergidae). *Afr. Zool.* **43**: 144-149.

- 540 Sichilima, A.M., Bennett, N.C., Faulkes, C.G. & Bronner, G.N. 2011. Field evidence for colony  
541 size and aseasonality of breeding and in Ansell's mole-rat, *Fukomys anselli* (Rodentia:  
542 Bathyergidae). *Afr. Zool.* **46**: 334-339.
- 543 Slater, G. J., Harmon, L.J., Wegmann, D., Joyce, P., Revell, L.J. & Alfaro, M.E. 2012. Fitting  
544 models of continuous trait evolution to incompletely sampled comparative data using  
545 approximate Bayesian computation. *Evolution* **66**:752–762 .
- 546 Van Daele, P.A., Blonde, P., Stjernstedt, R. & Adriaens, D. 2013. A new species of African  
547 mole-rat (*Fukomys*, Bathyergidae, Rodentia) from the Zaire-Zambezi watershed. *Zootaxa*  
548 **3636**: 171-189.
- 549 Wcislo, W.T. & Danforth, B.N. 1997. Secondly solitary: the evolutionary loss of social  
550 behavior. *Trends Ecol. Evol.* **12**: 468-474.
- 551 Wright, S. 1934. An analysis of variability in number of digits in an inbred strain of guinea pigs.  
552 *Genetics.* **19**(6): 506-536.
- 553 Young, A.J., Jarvis J.U.M., Barnaville, J. & Bennett, N.C. 2015. Workforce effects and the  
554 evolution of complex society in wild Damaraland mole rats. *Am. Nat.* **186**: 302-311.  
555

556 **Table 1. Summary of previous methods and the originality of this study.**

| Trait                        | Approach                                         |                                                              |
|------------------------------|--------------------------------------------------|--------------------------------------------------------------|
|                              | Univariate models                                | Multivariate models (link function)                          |
|                              | Mk model <sup>1</sup>                            | Mk model <sup>1</sup>                                        |
| Discrete                     | Threshold model <sup>2*</sup>                    | Threshold model <sup>2*</sup>                                |
|                              | PLogReg <sup>3</sup> (w/o independent variables) |                                                              |
| Continuous                   | PLogReg <sup>3</sup>                             | MCMCglmm <sup>4,5</sup>                                      |
|                              | MCMCglmm <sup>4,5</sup>                          | Threshold model <sup>2</sup><br>(determined by a threshold)* |
| Both discrete and continuous | -                                                | PLogReg <sup>3</sup> (logit link)                            |
|                              |                                                  | MCMCglmm <sup>4,5</sup> (logit and probit link)              |
|                              |                                                  | This study<br>(researcher-defined function)                  |

557 <sup>1</sup>Pagel 1994; Lewis 2001

558 <sup>2</sup>Felsenstein 2012

559 <sup>3</sup>Phylogenetic logistic regression, Ives and Garland 2010

560 <sup>4</sup>Hadfield and Nakagawa 2009

561 <sup>5</sup>Hadfield 2015

562 \*continuous trait (liability) that is unobservable

563

564 **Table 2. Data used in this study.**

| Species                                                             | Social system | Group size, mean (SD)           |
|---------------------------------------------------------------------|---------------|---------------------------------|
| Naked mole rat, <i>Heterocephalus glaber</i> <sup>1</sup>           | eusocial      | 75 (48.65) <sup>A</sup>         |
| Damaraland mole rat, <i>Fukomys damarensis</i> <sup>1</sup>         | eusocial      | 11 (6.26)                       |
| Whyte's mole rat, <i>Fukomys hottentotus</i> <sup>1</sup>           | social        | 5.16 (2.62) <sup>B</sup>        |
| Mechow's mole rat, <i>Fukomys mechowii</i> <sup>2</sup>             | social        | 9.91 (2.49)                     |
| Mashona mole rat, <i>Fukomys darlingi</i> <sup>3</sup>              | social        | 7 (not available <sup>C</sup> ) |
| Ansell's mole rat, <i>Fukomys ansellii</i> <sup>4</sup>             | social        | 8.72 (2.15)                     |
| Cape mole rat, <i>Georychus capensis</i> <sup>5</sup>               | solitary      | 1 <sup>D</sup>                  |
| Cape dune mole rat, <i>Bathyergus suillus</i> <sup>5</sup>          | solitary      | 1 <sup>D</sup>                  |
| Namaqua dune mole rat, <i>Bathyergus janetta</i> <sup>5</sup>       | solitary      | 1 <sup>D</sup>                  |
| Silvery mole rat, <i>Heliophobius argenteocinereus</i> <sup>5</sup> | solitary      | 1 <sup>D</sup>                  |

565

566 <sup>1</sup>Bennett & Faulkes 2000; <sup>2</sup>Sichilima *et al.* 2008; <sup>3</sup>Bennett *et al.* 1994; <sup>4</sup>Sichilima *et al.* 2011; <sup>5</sup>Burda & Kawalika  
567 1993; see Van Daele *et al.* (2013) for a recent classification.

568 <sup>A</sup>Because group sizes were categorized at an interval of 25 individuals, we used the mean value of each range for  
569 calculating the mean and SD (e.g., 37.5 for groups of 25 to 50 individuals).

570 <sup>B</sup>When calculating the mean group size of this species, we used a group size of 11 when it exceeded 10, because the  
571 original data for group size pooled group sizes larger than 10 into ">10" (p. 92 in Bennett & Faulkes 2000).

572 <sup>C</sup>Because no data on intraspecific variation were available, we used the mean value of the SD, 2.42, of the other three  
573 social species.

574 <sup>D</sup>The mean litter size ranges from 2.46 to 5.94 in solitary species (Jones *et al.* 2009). To account for this, we set a  
575 value of 2.56 as their SD to cover the range of possible group sizes.

576 **Table 3. Parameters estimated in this study.**

| Parameter                                                                | Notation   | Prior distribution | Posterior distribution (95% CI) |                       |
|--------------------------------------------------------------------------|------------|--------------------|---------------------------------|-----------------------|
|                                                                          |            |                    | Model 1 (logistic)              | Model 2 (exponential) |
| Most recent common ancestor (MRCA)                                       | $\theta$   | U(1.001, 10)       | 1.1–5.22                        | 2.45–9.15             |
| Baseline evolutionary rate (per million years)                           | $\mu$      | U(0.001, 30)       | 6.4–29.5                        | 3.62–28.3             |
| Directional selection (naked mole rats)                                  | $k_n$      | U(0.001, 30)       | 0.99–3.57                       | 1.01–1.93             |
| Directional selection (Damaraland mole rats)                             | $k_d$      | U(0.001, 5)        | 0.82–4.22                       | 0.82–4.64             |
| Curvature of transition functions (solitary $\rightleftharpoons$ social) | $a$ or $c$ | U(-15,15)          | $a$ : 1.52–14.50                | $c$ : 1.28–14.60      |
| Position of transition functions                                         | $b$ or $d$ | U(0,10)            | $b$ : 1.52–4.94                 | $d$ : 1.28–5.07       |

577

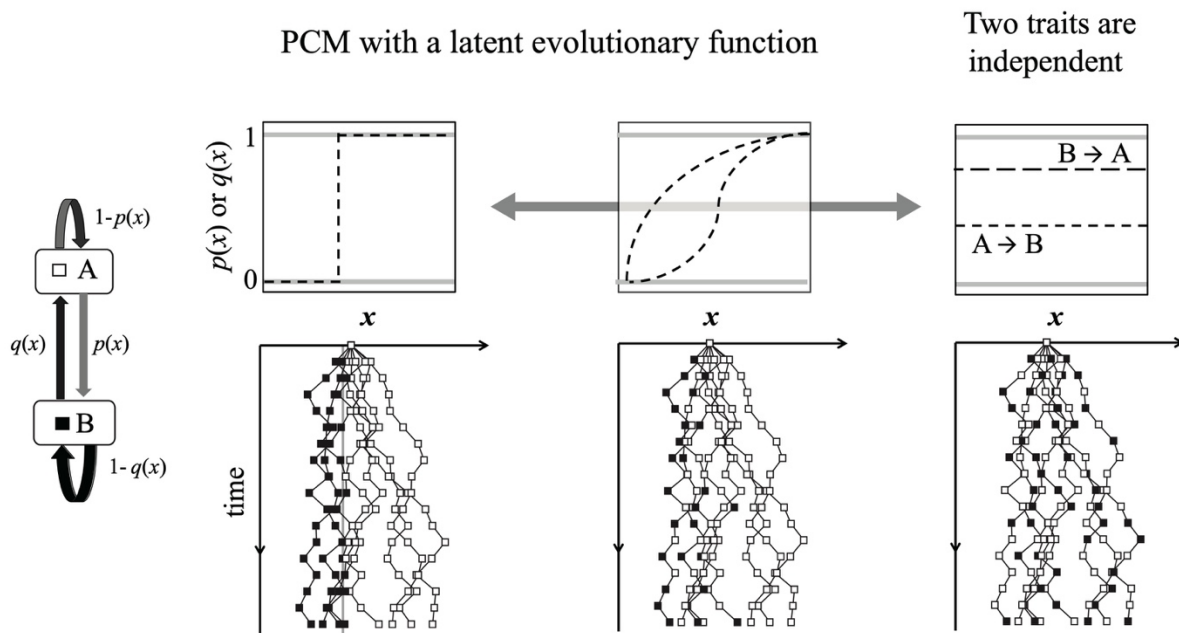

578

579 **Fig. 1. Variation in multivariate PCMs with a latent function between discrete and**

580 **continuous traits.** Conventional PCMs can explore various latent evolutionary functions

581 between continuous and discrete traits (Table 1). Here, we consider a simple example of the

582 evolutionary link between a continuous and a discrete trait. The continuous trait ( $x$ ) evolves by a

583 process similar to Brownian motion. The discrete trait, on the other hand, evolves according to

584 the transition probabilities  $p(x)$  and  $q(x)$ , i.e., the latent evolutionary functions. The state of the

585 discrete trait at each time step is shown as a white (A) or black (B) square. At one extreme, the

586 transition of discrete states is determined by a certain “threshold” value of the continuous trait.

587 At the other extreme, the discrete trait and the continuous trait are independent. In such a case,

588 the transition probabilities do not vary with the continuous traits (right). In our framework, any

589 functions between the two extreme cases can be incorporated based on biological hypotheses

590 (middle). Furthermore,  $x$  can be either a measurable trait or a latent value. Here, logistic and

591 exponential functions are shown as examples.

592

593



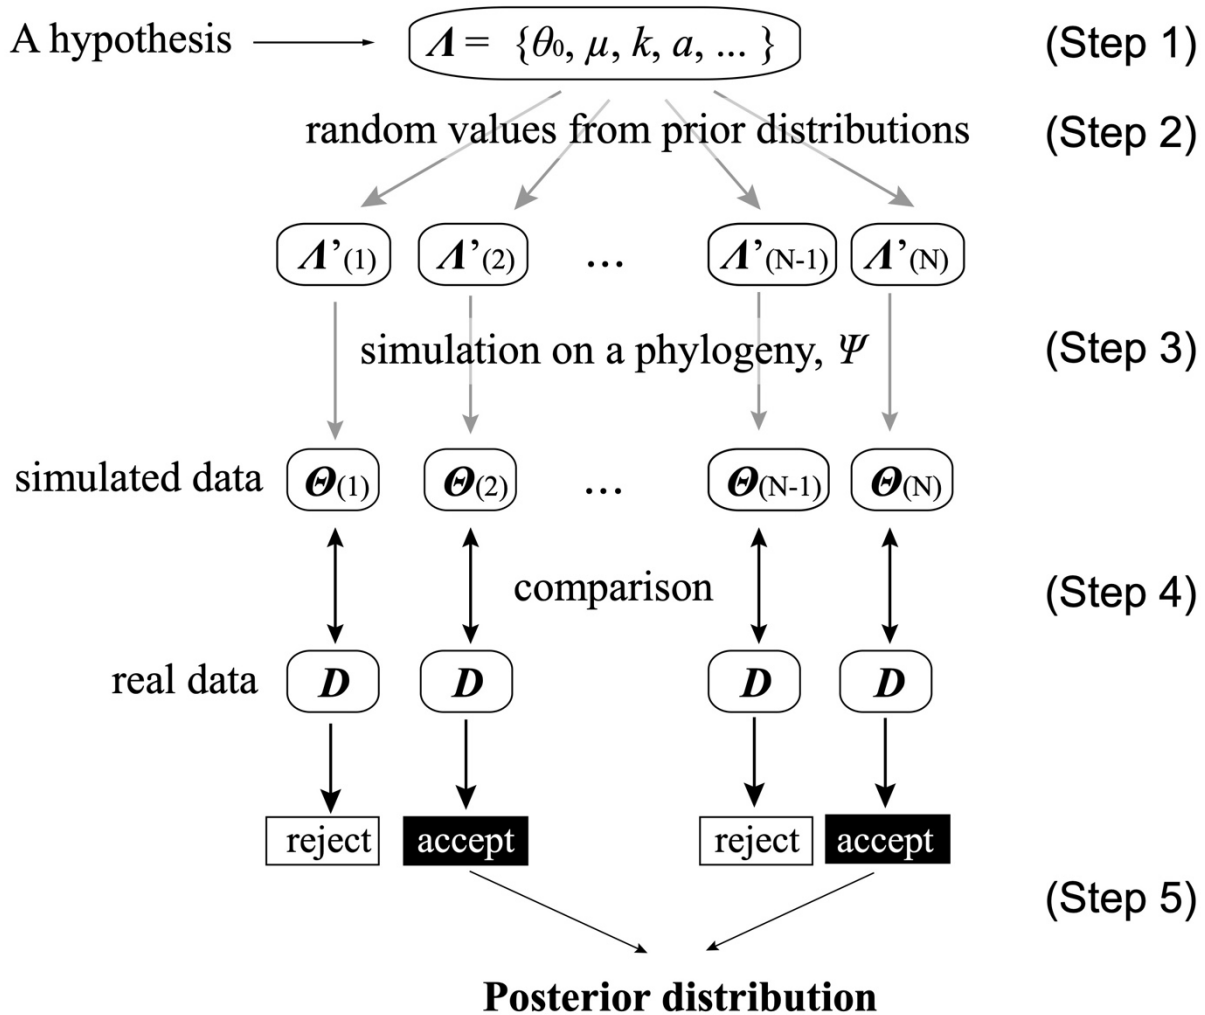

594

595 **Fig. 2. Our ABC-PCM with latent evolutionary functions.** Schematic of our ABC-PCM  
 596 approach. First, determine parameters of interest and set prior distributions (Step 1). Example  
 597 parameters include phenotype of the MRCA ( $\theta_0$ ), evolutionary rate ( $\mu$ ), directional selection  
 598 parameter ( $k$ ), latent function parameter ( $a$ ), and so on. Next, generate random values for  
 599 parameters from the prior distributions (Step 2). Trait simulations on a phylogeny  $\Psi$  are then  
 600 conducted (Step 3), and the simulated data  $\Theta$  are compared to real data  $D$  to determine whether  
 601 the data are accepted or rejected (Step 4). A number ( $N$ ) of simulations are conducted until  
 602 enough samples are collected to infer the posterior distribution (Step 5).

603

604

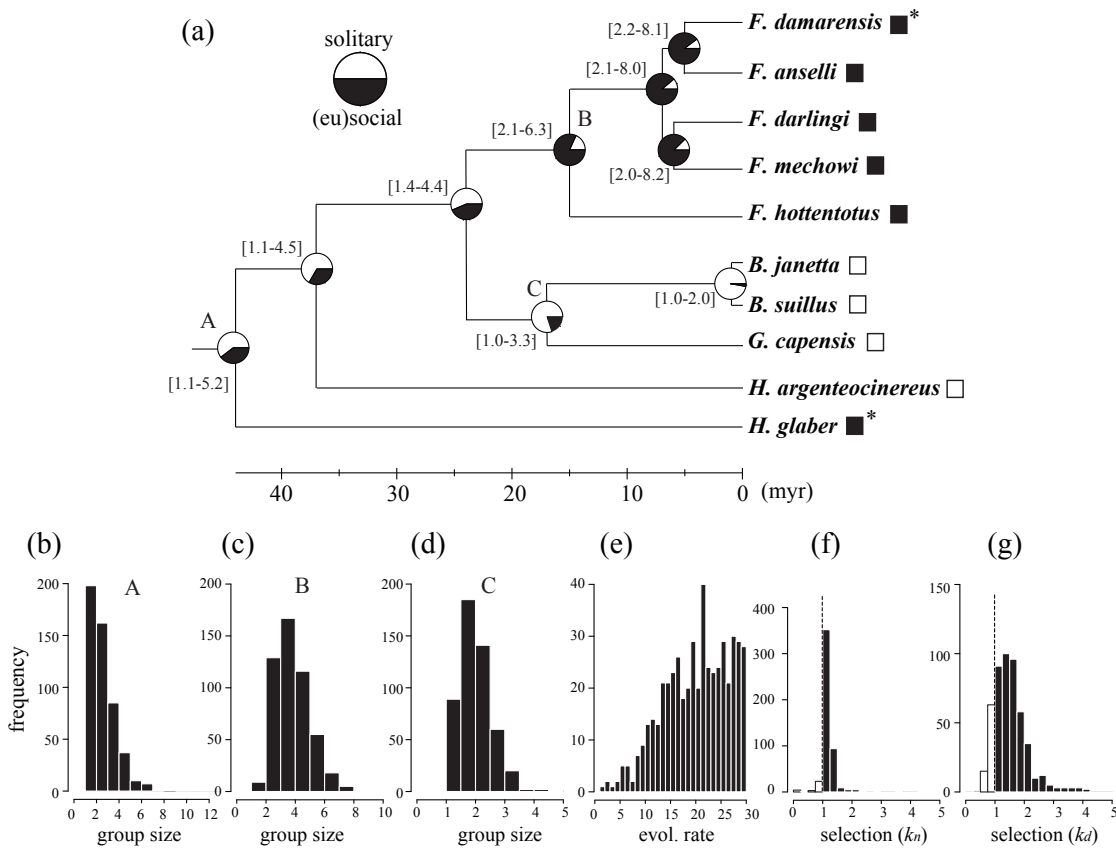

605

606

607

608

609

610

611

612

613

614

615

616

**Fig. 3. The estimated evolutionary trajectory with the latent function being logistic (model 1).** (a) The estimated parameters on the phylogeny. The social state of each tip species is shown as black (solitary) or white (social) squares. Asterisks indicate eusocial species. The proportion of solitary/social states and the 95% CI of the posterior distribution of group size (within brackets) are shown at each internal node. (b–d) The distributions of simulated group size at nodes A (MRCA), B, and C in the phylogeny. (e) The posterior distribution of the baseline evolutionary rate. (f, g) The posterior distributions of the selection coefficients  $k_n$  and  $k_d$ . The dashed line at  $k = 1$  indicates the proportion of simulations in which directional selection for larger group size was detected (black histograms).

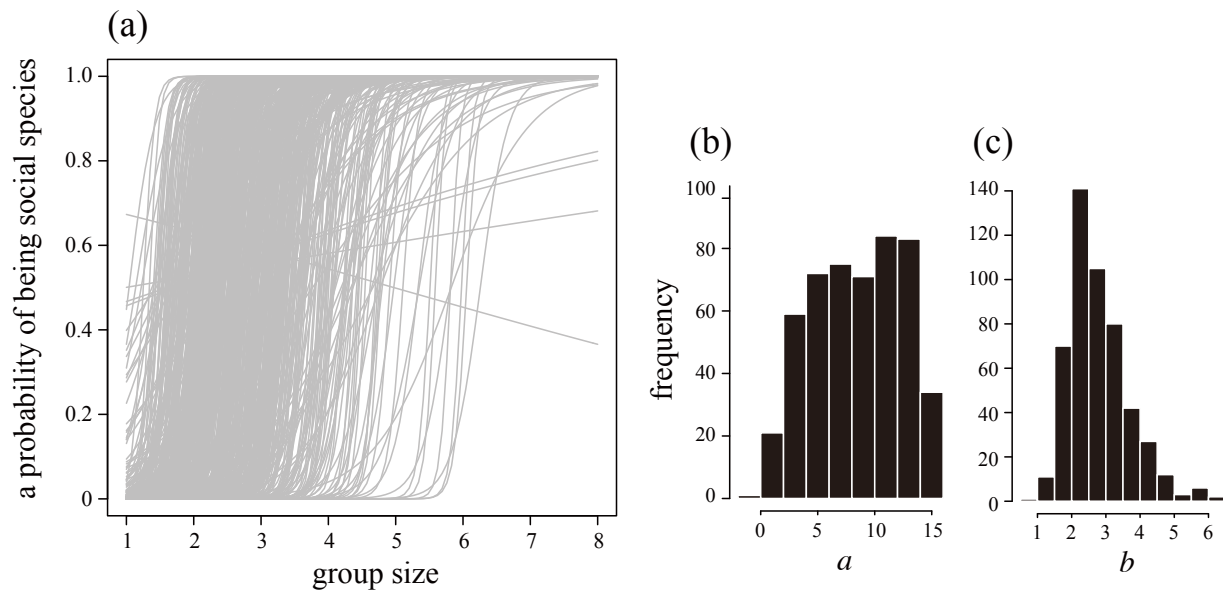

617

618 **Fig. 4. Accepted latent functions in model 1.** (a) All 500 accepted latent functions  $p(x)$ , i.e., the  
619 probability of transition from a solitary state to a social state as a function of group size. Most  
620 accepted functions increased steeply at group sizes of 2 to 4. (b, c) The posterior distributions of  $a$   
621 and  $b$ , the curvature of the function and the group size at which  $p(x)$  equals 0.5.

622

623

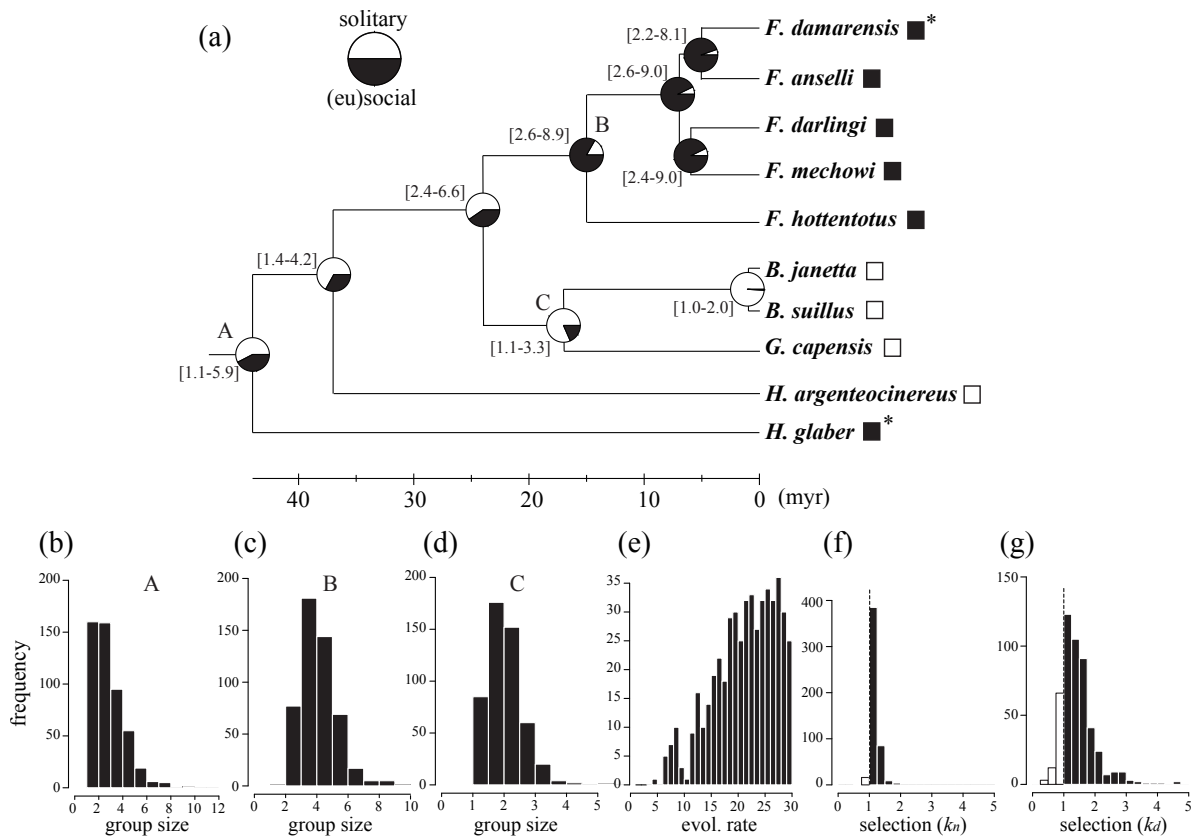

624

625 **Fig. 5. The estimated evolutionary trajectory with the latent function being exponential**

626 **(model 2).** (a) The estimated parameters on the phylogeny. The social state of each tip species is

627 shown as black (solitary) or white (social) squares. Asterisks indicate eusocial species. The

628 proportion of solitary/social states and the 95% CI of the posterior distribution of group size

629 (within brackets) are shown at each internal node. (b–d) The distributions of simulated group size

630 at nodes A (MRCA), B, and C in the phylogeny. (e) The posterior distribution of baseline

631 evolutionary rate. (f, g) The posterior distributions of the selection coefficients  $k_n$  and  $k_d$ . The

632 dashed line at  $k = 1$  indicates the proportion of simulations in which directional selection for larger

633 group size was detected (black histograms).

634

635

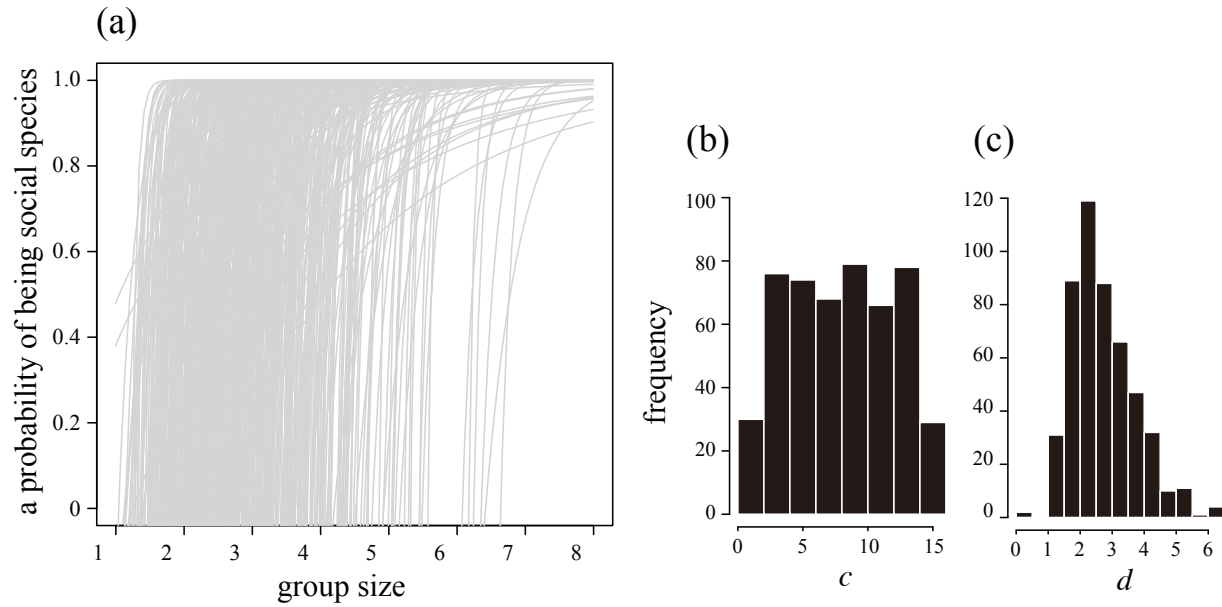

636

637 **Fig. 6. Accepted latent functions in model 2.** (a) All 500 accepted latent functions corresponding  
638 to  $p(x)$ . Similar to the case in model 1, most of the accepted functions increased at a group size of  
639 2 to 4. (b, c) The posterior distributions of  $c$  and  $d$ , the curvature of the function and the group size  
640 at which  $p(x)$  equals 0.
